# Supplementary material for: Combined Use of Astragalus Polysaccharide and Berberine Attenuates Insulin Resistance in IR-HepG2 Cells via Regulation of the Gluconeogenesis Signaling Pathway
Source: Front Pharmacol. 2019 Dec 23;10:1508. doi: 10.3389/fphar.2019.01508 (PMC6936338; doi:10.3389/fphar.2019.01508)
Supplement: Supplementary Table 1 — The raw data of intracellular Ca2+ fluorescence intensity. [file Table_1.xlsx]

## Sheet: Sheet1
time(Sec)	Model group	Model group +10mg APBBR	Control group	Control group +10mg APBBR
0	100.0±21.4	100.0±19.2	100.0±20.7	100.0±30.3
5	100.3±21.2	100.2±19.1	99.5±21.7	100.2±30.8
10	100.1±21.0	99.7±20.4	97.1±21.4	101.4±32.1
15	99.8±21.2	100.0±20.1	94.4±20.3	101.5±32.0
20	99.7±21.4	99.5±19.5	91.5±20.9	100.5±31.2
25	100.2±21.2	100.1±19.6	89.4±20.4	100.5±31.2
30	100.0±20.7	100.6±20.2	89.3±19.9	101.0±31.9
35	99.5±20.6	99.5±21.2	89.4±20.2	103.9±33.5
40	99.5±21.1	99.5±22.1	87.6±19.9	104.1±34.0
45	99.8±21.7	100.2±20.7	83.1±19.5	102.2±32.4
50	99.4±21.1	99.9±20.2	83.7±19.6	102.2±32.0
55	100.6±21.3	100.9±19.4	82.9±19.2	100.6±30.9
61	100.4±20.6	101.6±19.9	79.2±19.0	101.4±31.5
66	101.2±21.7	101.3±18.3	79.3±18.9	100.3±30.1
71	101.4±21.5	101.2±18.0	79.7±19.0	98.6±28.5
76	101.5±20.9	101.3±16.6	79.8±18.7	97.6±28.0
81	102.1±21.1	102.7±18.9	80.3±19.2	100.2±29.8
86	101.1±21.4	101.6±18.4	79.2±19.0	100.6±30.1
91	101.5±20.8	101.5±18.9	76.6±18.7	101.4±31.1
96	101.7±21.3	101.8±19.2	79.4±18.9	101.9±31.0
101	101.9±21.8	101.1±17.7	80.6±18.0	100.2±29.7
106	101.7±21.3	101.6±17.3	80.8±18.9	99.1±28.7
111	102.3±21.4	102.1±16.5	79.8±18.5	98.0±27.7
116	102.6±21.5	101.9±16.7	81.6±19.1	97.3±26.6
121	102.7±20.9	101.6±16.9	83.7±18.2	98.6±27.5
126	102.4±20.5	102.1±17.9	86.2±18.6	99.9±29.2
131	102.4±21.7	101.3±17.4	87.4±18.1	98.9±28.6
136	102.7±20.8	101.3±15.8	86.6±19.1	97.8±28.2
141	101.9±20.5	101.3±16.3	85.3±18.8	97.8±27.8
146	102.1±20.9	101.4±15.6	86.3±19.2	96.2±25.9
151	102.9±20.7	101.9±16.0	87.4±18.3	96.9±26.5
156	102.3±21.2	102.0±16.4	89.3±19.0	98.0±27.0
161	102.7±20.8	102.0±16.4	90.3±18.4	98.0±27.6
166	102.5±20.8	101.4±16.7	92.3±18.8	98.3±27.5
171	102.8±20.6	102.0±16.3	94.3±18.2	97.7±27.7
177	103.3±21.3	102.8±16.1	93.0±18.5	98.2±27.4
182	103.0±21.0	102.2±15.4	91.9±19.1	97.3±26.7
187	103.0±20.6	102.8±14.6	93.2±19.0	96.6±26.0
192	103.4±21.0	102.8±15.1	94.1±19.4	96.9±26.0
197	103.7±21.2	102.6±14.6	94.4±18.6	96.4±25.9
202	103.6±20.9	102.9±14.2	95.0±19.7	95.2±24.9
207	104.2±20.6	103.2±14.0	95.9±18.8	95.5±24.7
212	104.1±20.9	102.7±14.3	98.4±19.3	95.8±25.0
217	104.3±20.9	103.0±13.9	98.8±19.3	96.5±25.6
222	104.7±20.4	103.5±14.5	99.8±19.3	96.8±25.2
227	104.0±19.8	103.5±14.4	99.7±19.9	96.3±24.6
232	104.8±21.1	103.1±14.3	100.5±20.2	95.8±25.1
237	104.4±20.8	102.9±12.2	101.6±19.5	93.7±23.3
242	104.0±20.2	103.1±12.0	103.7±20.8	92.3±22.2
247	103.1±18.9	102.5±10.6	105.0±20.6	90.7±20.8
252	102.7±19.4	101.9±10.2	106.4±20.6	89.1±20.0
257	102.1±18.4	100.7±9.5	107.7±20.7	86.7±18.6
262	101.4±17.9	100.0±8.5	109.5±21.8	85.2±18.0
267	101.4±18.1	99.9±9.4	110.8±21.0	84.6±17.7
272	101.6±17.8	100.2±8.8	112.9±21.5	84.5±17.7
277	101.9±18.1	98.9±8.6	113.1±21.5	83.2±16.7
282	101.8±17.9	99.2±8.5	113.6±21.1	84.4±16.8
287	103.9±18.2	101.8±9.0	112.6±21.8	86.5±18.0
292	106.1±19.1	104.4±9.6	111.6±21.9	88.8±18.8
298	106.1±19.5	104.6±9.9	110.6±21.2	89.6±19.2
303	107.7±19.2	105.7±10.6	108.8±21.0	91.0±20.1
308	108.5±19.5	106.8±11.3	108.8±22.1	93.3±21.1
313	109.7±20.3	108.1±12.2	107.3±21.4	96.3±22.5
318	110.6±20.2	108.7±13.0	106.0±21.6	99.2±24.0
323	110.4±21.0	108.7±13.4	103.7±21.2	100.7±25.2
328	110.9±20.6	109.6±15.0	101.5±21.6	103.8±27.5
333	109.1±21.8	106.1±16.6	102.1±21.6	105.9±29.4
338	107.8±21.2	105.3±17.8	102.2±21.9	105.9±30.4
343	107.8±21.8	105.9±17.9	98.5±21.7	105.6±29.7
348	106.2±20.5	103.7±17.5	94.8±22.0	106.9±31.5
353	105.3±22.0	103.7±18.4	91.6±22.2	107.2±31.8
358	105.7±21.9	103.8±18.9	90.0±22.7	108.6±32.0
363	105.0±22.0	103.3±18.6	93.9±23.3	109.0±32.9
368	106.4±22.3	104.0±19.2	94.3±22.5	109.4±32.5
373	104.7±21.4	102.3±19.3	93.2±22.4	112.4±34.9
378	102.3±23.0	99.2±20.6	91.9±23.3	113.0±35.8
383	100.1±22.6	97.9±21.8	90.7±22.8	114.4±36.7
388	97.6±22.9	95.0±23.0	89.2±22.5	115.4±38.5
393	94.2±22.7	93.0±23.8	86.9±22.7	115.4±39.9
398	88.6±22.3	87.1±25.3	84.6±22.7	114.7±39.4
403	91.7±23.2	89.4±25.1	83.2±23.3	114.9±38.8
408	91.2±22.5	88.8±24.7	82.2±22.6	114.8±38.6
414	87.7±22.0	85.5±24.0	82.1±22.8	114.2±40.1
419	87.5±23.8	84.5±24.8	82.2±22.7	113.7±39.8
424	89.0±23.2	86.1±25.1	84.0±23.7	113.3±37.8
429	91.1±23.6	87.4±24.8	84.2±22.9	114.4±38.0
434	93.6±22.9	90.4±24.5	85.6±22.6	115.2±37.9
439	93.3±23.2	90.5±24.9	88.0±22.8	115.9±38.2
444	93.1±22.3	89.8±24.0	87.3±22.3	115.7±38.2
449	94.2±22.5	91.8±23.3	83.4±22.2	116.4±38.9
454	91.4±23.0	87.9±23.9	81.7±22.6	115.4±37.6
459	93.2±22.9	89.6±23.6	83.1±23.2	116.6±38.6
464	91.1±22.5	87.0±23.0	83.0±21.9	116.8±39.5
469	90.5±23.5	86.9±24.1	84.9±22.9	116.1±38.5
474	93.4±22.8	89.2±23.7	86.2±22.9	116.4±38.2
479	93.2±23.0	89.6±23.5	86.0±23.5	117.4±39.3
484	92.5±23.1	88.9±24.0	83.6±23.0	116.5±38.2
489	94.1±23.2	89.7±23.6	86.3±23.3	117.4±37.7
494	94.5±23.1	89.9±23.6	87.9±22.7	117.8±38.1
499	94.4±22.9	90.5±23.4	90.7±23.5	117.6±37.8
504	96.8±23.1	92.1±22.9	94.7±23.5	118.8±38.4
509	98.1±23.8	93.9±22.7	93.4±22.5	119.1±37.7
514	101.4±23.7	96.1±22.0	95.0±23.2	119.7±37.0
519	103.7±23.6	98.1±21.5	95.6±23.2	119.4±36.5
524	105.4±23.5	100.2±21.8	97.6±22.8	121.1±37.4
530	107.2±24.0	101.3±20.6	98.8±23.0	120.7±36.3
535	108.1±22.9	102.5±20.3	102.3±23.2	121.4±37.2
540	111.7±23.7	105.4±19.6	102.9±22.3	121.7±36.2
545	114.6±24.4	108.1±19.5	103.9±22.3	121.5±36.1
550	116.9±23.4	108.5±18.6	103.5±22.3	121.7±35.7
555	118.4±24.2	111.2±17.8	103.5±23.0	121.3±35.5
560	117.2±23.6	110.0±17.8	104.3±21.9	123.3±36.9
565	117.3±23.5	108.9±17.6	102.7±22.7	123.5±36.6
570	116.3±24.7	107.7±18.8	102.0±22.8	123.9±36.7
575	116.2±24.3	108.5±18.4	105.0±22.9	124.1±37.1
580	115.3±24.7	107.8±19.3	104.3±22.3	124.0±37.0
585	117.8±25.8	108.1±18.7	107.7±22.9	123.3±36.4
590	120.4±25.2	110.9±17.2	109.9±22.2	123.6±36.2
595	122.4±24.9	112.7±16.6	111.1±22.6	124.2±36.5
600	122.1±24.2	112.8±17.1	110.3±22.3	124.1±36.1
605	125.7±24.7	114.8±16.5	112.8±22.5	124.6±36.4
610	127.3±25.9	116.2±16.9	114.2±22.7	125.9±37.4
615	128.7±25.5	117.8±16.1	114.5±22.9	125.3±36.8
620	131.1±25.4	119.5±16.1	114.0±22.9	125.3±36.6
625	132.5±26.2	120.5±15.1	115.5±23.3	125.6±37.3
630	133.5±26.1	120.9±15.0	116.9±23.0	125.1±36.7
635	135.7±26.0	122.9±14.2	119.4±23.8	125.3±36.5
640	136.8±26.0	123.9±13.9	120.9±23.7	125.9±37.2
646	138.9±25.3	125.2±13.1	120.5±24.5	124.9±36.9
651	141.4±26.4	127.1±12.9	122.7±24.1	124.1±36.1
656	142.9±25.6	128.9±12.9	125.4±24.2	125.3±37.2
661	143.8±26.1	129.3±13.4	124.9±24.2	124.1±37.6
666	144.5±26.2	130.0±12.7	126.5±24.5	122.5±36.4
671	146.6±26.2	130.9±12.9	127.4±24.5	121.9±35.7
676	147.3±25.8	131.9±13.6	129.0±24.9	120.6±35.9
681	149.1±26.8	133.4±13.4	131.4±26.4	121.1±36.1
686	150.1±27.4	133.7±13.5	132.9±25.9	121.1±35.9
691	150.7±26.7	134.7±13.5	135.0±26.6	119.8±35.6
696	152.7±27.0	134.7±12.9	136.9±27.0	119.5±35.5
701	150.9±26.6	134.1±13.6	138.9±27.4	118.5±35.0
706	153.0±26.5	135.4±13.7	140.1±27.3	118.3±36.0
711	155.2±27.1	136.2±13.3	140.3±27.2	118.5±36.2
716	157.6±28.0	138.7±14.1	137.1±27.2	122.5±36.7
721	159.6±27.7	140.2±13.2	132.9±25.7	123.5±37.6
726	161.7±28.6	141.6±13.8	132.2±26.6	127.4±37.9
731	163.2±27.8	143.1±13.3	127.4±24.6	131.0±41.2
736	164.9±29.0	143.9±13.7	125.3±25.2	133.2±41.2
741	164.2±27.9	145.1±14.1	122.9±25.7	138.5±42.8
746	157.6±29.5	136.7±14.8	121.2±24.4	140.8±44.9
751	155.7±29.7	133.8±15.5	123.3±23.9	139.6±44.2
756	153.0±30.7	132.0±15.3	114.5±24.3	140.2±43.7
761	146.1±29.2	124.5±16.7	108.0±23.3	138.4±42.7
767	135.3±33.0	116.7±18.7	107.0±24.1	134.0±38.7
772	127.4±31.7	111.6±18.8	105.9±23.7	131.5±38.3
777	118.7±32.7	104.6±20.6	106.7±24.0	127.4±37.3
782	115.7±32.3	102.7±20.9	104.0±24.0	126.4±36.7
787	110.7±30.8	100.3±19.9	102.9±24.3	124.6±37.1
792	104.1±31.0	94.6±21.6	101.9±24.3	120.2±36.2
797	101.8±30.1	93.2±22.1	91.5±24.1	120.2±36.8
802	103.2±32.6	94.8±23.3	88.2±24.3	120.3±37.0
807	104.0±30.7	95.0±21.7	89.3±25.1	121.9±36.9
812	103.8±31.3	95.5±22.4	88.2±24.2	123.0±37.4
817	104.0±31.1	96.2±23.6	89.0±24.7	124.2±37.7
822	108.8±32.1	99.9±22.5	88.7±24.8	126.0±37.9
827	108.9±31.2	98.9±22.0	88.2±25.5	126.2±37.9
832	109.5±32.7	99.5±23.2	90.1±24.8	126.3±38.3
837	115.5±33.0	104.4±23.1	89.5±24.6	129.8±38.3
842	114.8±31.8	105.4±22.2	88.7±24.6	132.3±38.7
847	115.1±33.1	104.8±22.4	87.5±25.6	130.2±38.7
852	113.0±31.1	103.4±22.8	87.9±25.3	130.3±38.8
857	110.7±31.6	101.6±22.9	92.2±25.5	129.1±38.5
862	110.4±30.9	101.4±22.4	92.4±25.0	128.8±38.7
867	107.1±31.2	98.8±22.1	92.3±25.6	127.1±38.9
872	107.7±30.8	99.7±22.9	93.5±25.6	127.6±39.2
877	104.8±30.5	97.6±22.9	94.8±25.4	126.6±39.8
883	104.8±30.2	97.5±23.2	95.7±25.5	126.6±39.8
888	109.4±31.3	100.4±22.7	93.7±25.0	128.6±39.3
893	112.0±31.7	103.0±22.5	93.8±24.9	132.0±40.2
898	116.0±32.4	106.2±23.6	89.9±26.1	133.4±40.0
903	112.9±29.0	104.9±21.1	93.1±26.2	132.6±40.0
908	115.4±32.7	106.1±23.5	95.0±26.0	132.5±40.4
913	108.8±27.7	100.8±20.3	95.5±25.5	128.3±39.0
918	95.0±25.3	89.1±20.4	95.1±26.3	119.3±38.8
923	91.2±25.9	86.0±21.2	95.4±25.5	116.1±39.2
928	92.1±25.6	86.5±20.2	98.2±26.5	117.4±38.8
933	97.8±26.8	91.7±20.6	100.2±26.2	119.1±38.3
938	90.9±24.3	84.6±19.3	102.8±26.7	112.6±36.4
943	78.4±19.9	74.0±17.7	102.3±26.5	101.3±33.9
948	79.5±21.6	74.5±17.4	102.5±26.2	102.1±34.6
953	85.7±24.2	79.9±18.9	99.9±26.1	107.1±35.9
958	79.7±19.9	73.8±16.7	98.7±26.1	101.9±33.5
963	79.5±21.1	73.5±15.8	100.1±26.7	99.2±32.7
968	77.8±20.5	72.3±16.1	102.5±26.7	98.2±31.7
973	79.3±21.4	73.1±16.4	105.4±27.2	98.3±31.6
978	84.8±23.7	78.9±17.6	108.2±27.9	104.1±33.2
983	91.9±25.5	84.9±18.9	110.7±26.2	112.0±35.4
988	92.9±24.4	86.3±18.3	110.2±27.6	113.6±35.1
993	104.3±29.2	96.0±20.6	105.1±26.4	121.9±36.6
999	102.0±25.9	94.1±19.0	101.4±27.0	121.7±36.5
1004	110.9±29.6	100.5±20.4	100.6±27.9	127.1±38.2
